# Supplementary material for: Sex differences in nucleus accumbens core circuitry engaged by binge-like ethanol drinking
Source: PubMed Central journal article supplement (PMC11370393; doi:10.1101/2024.08.15.608144), 2024-08-19
Supplement: media-1.pdf [file media-1.pdf]

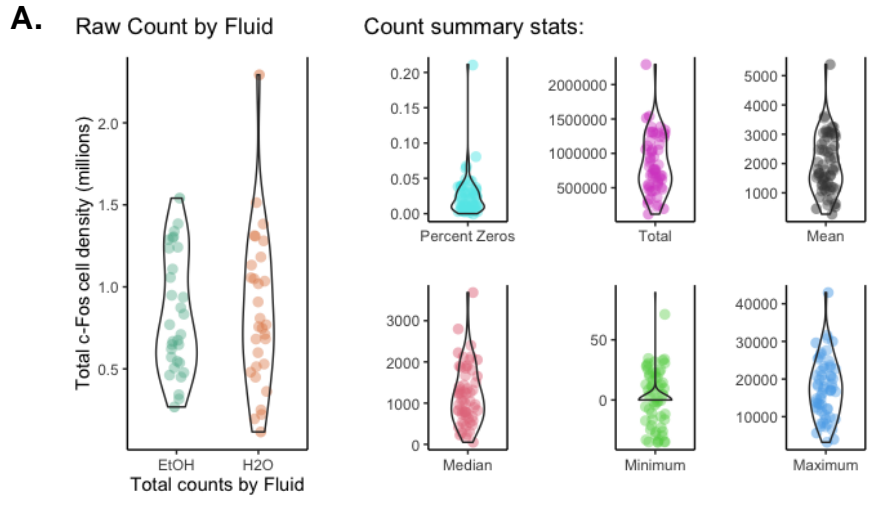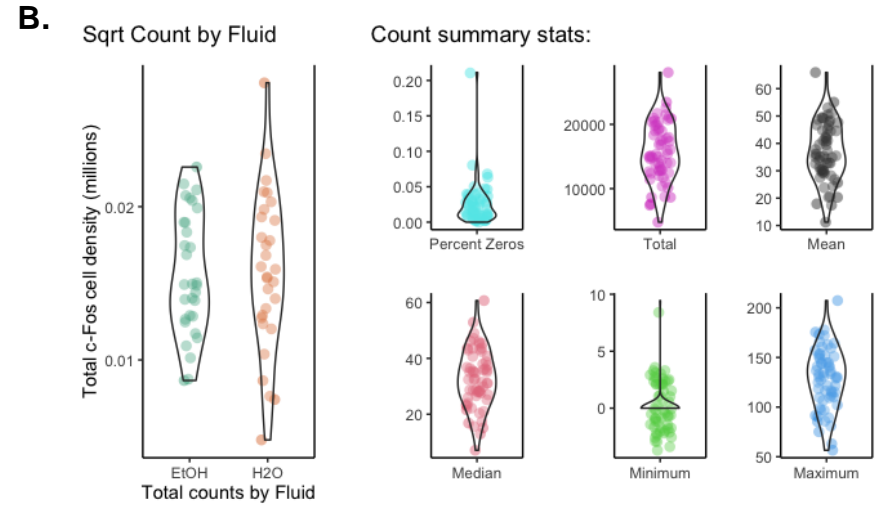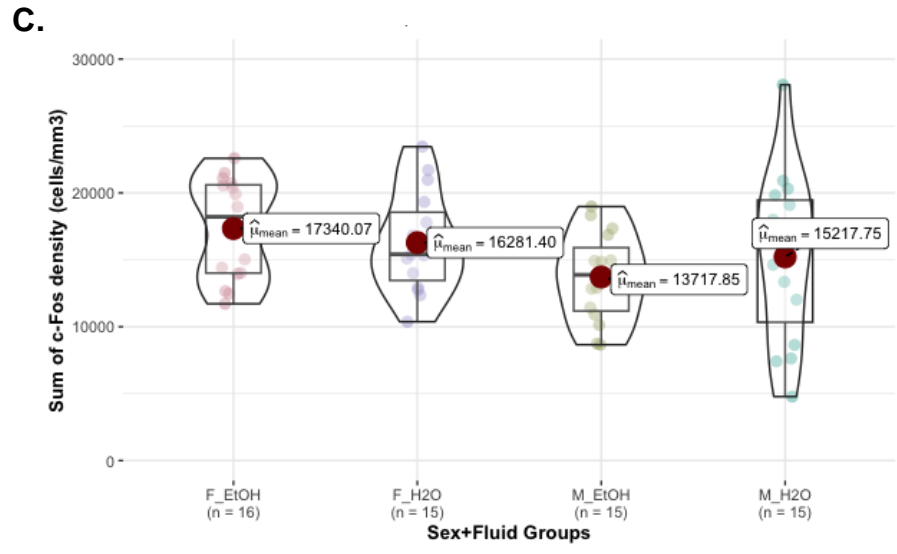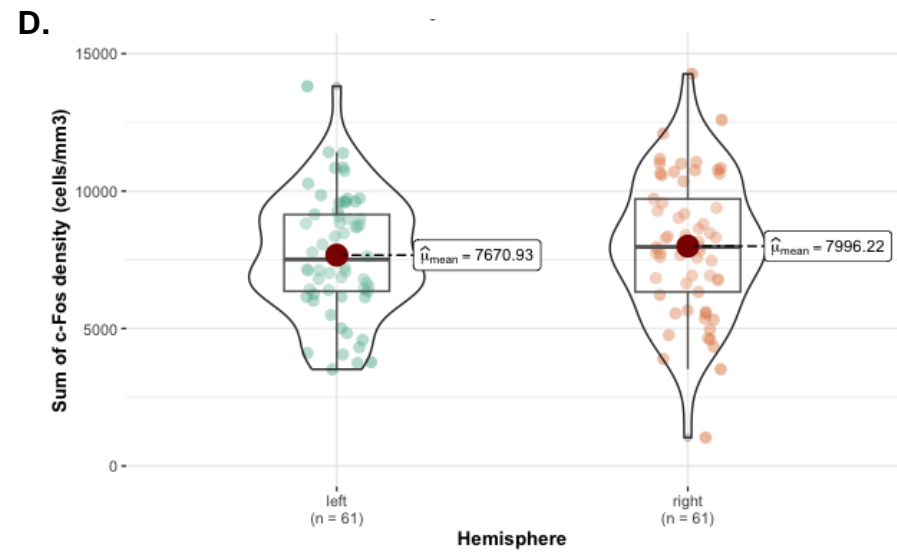

Figure S1

**A. Male Water**

**B. Female Water**

**C. Male Ethanol**

**D. Female Ethanol**

+1.42mm

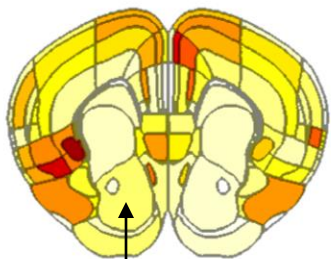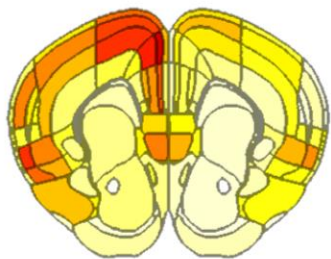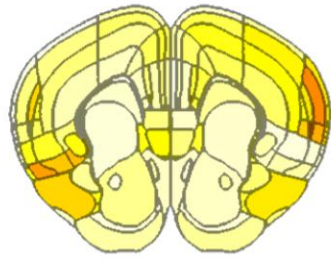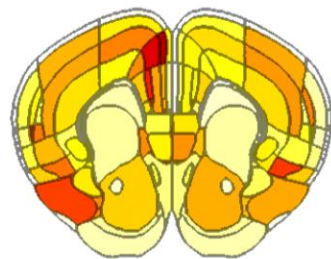

-0.34mm

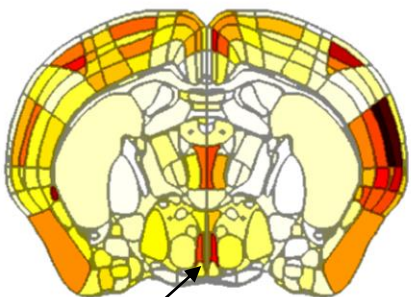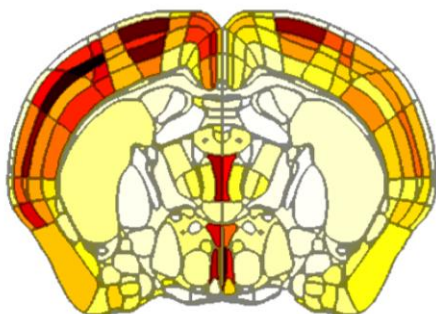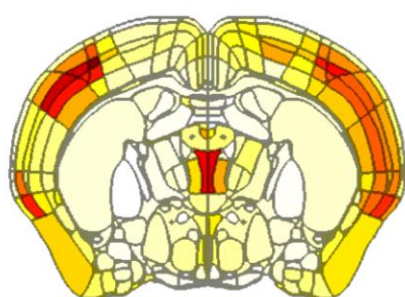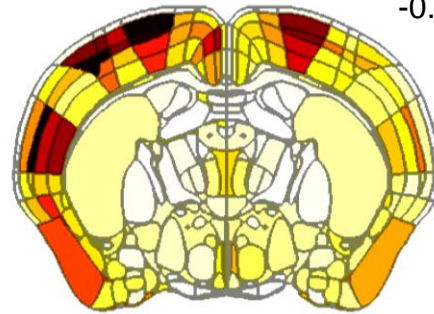

-1.50mm

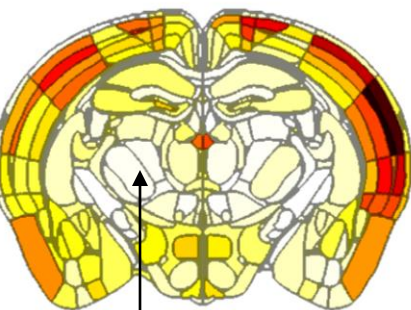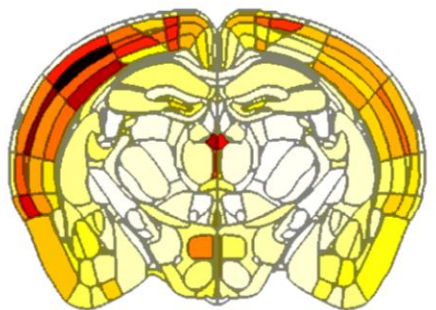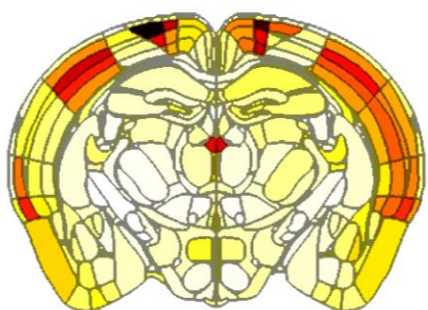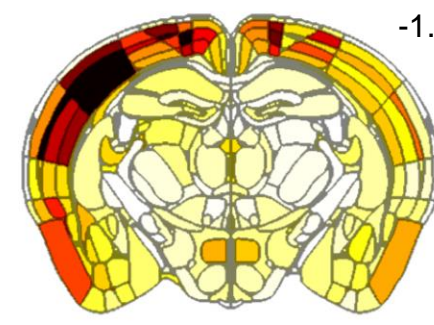

Cells per  $mm^3$

0 10000

Figure S2

**A. Ethanol vs Water – Sex Collapsed**

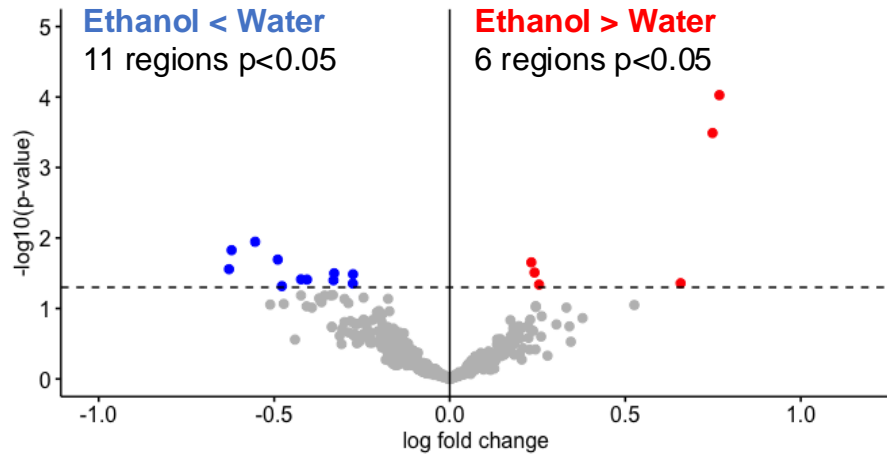

**B. Female v Male – Fluid Collapsed**

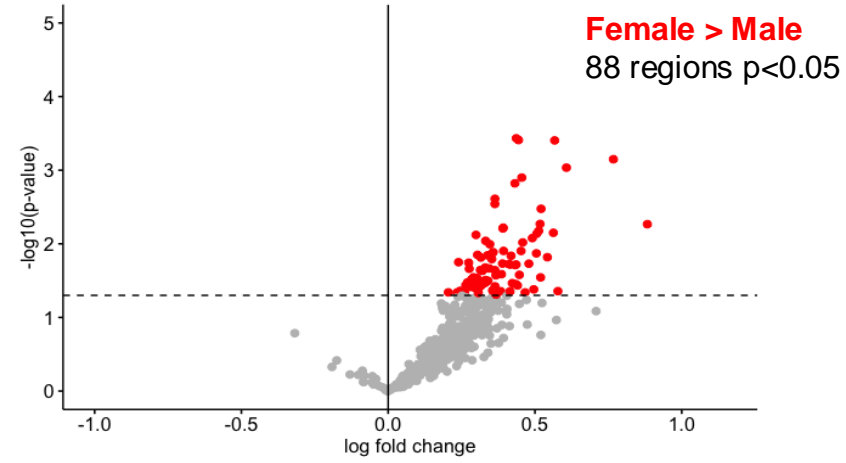

**C. Female: Ethanol v Water**

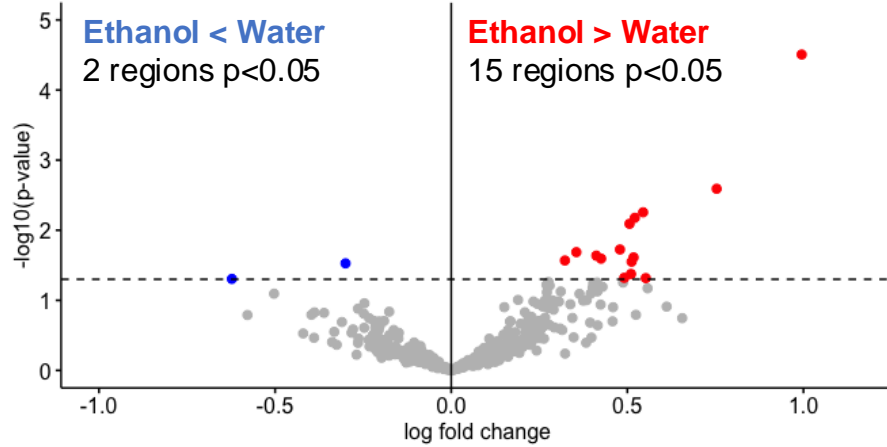

**D. Male: Ethanol v Water**

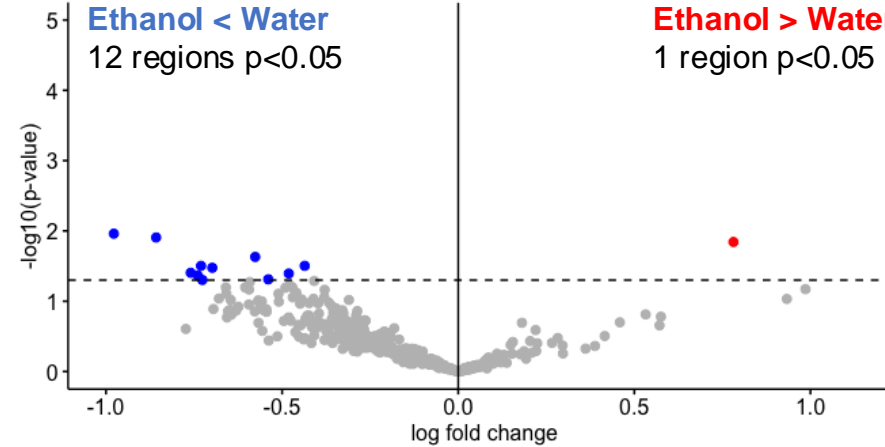

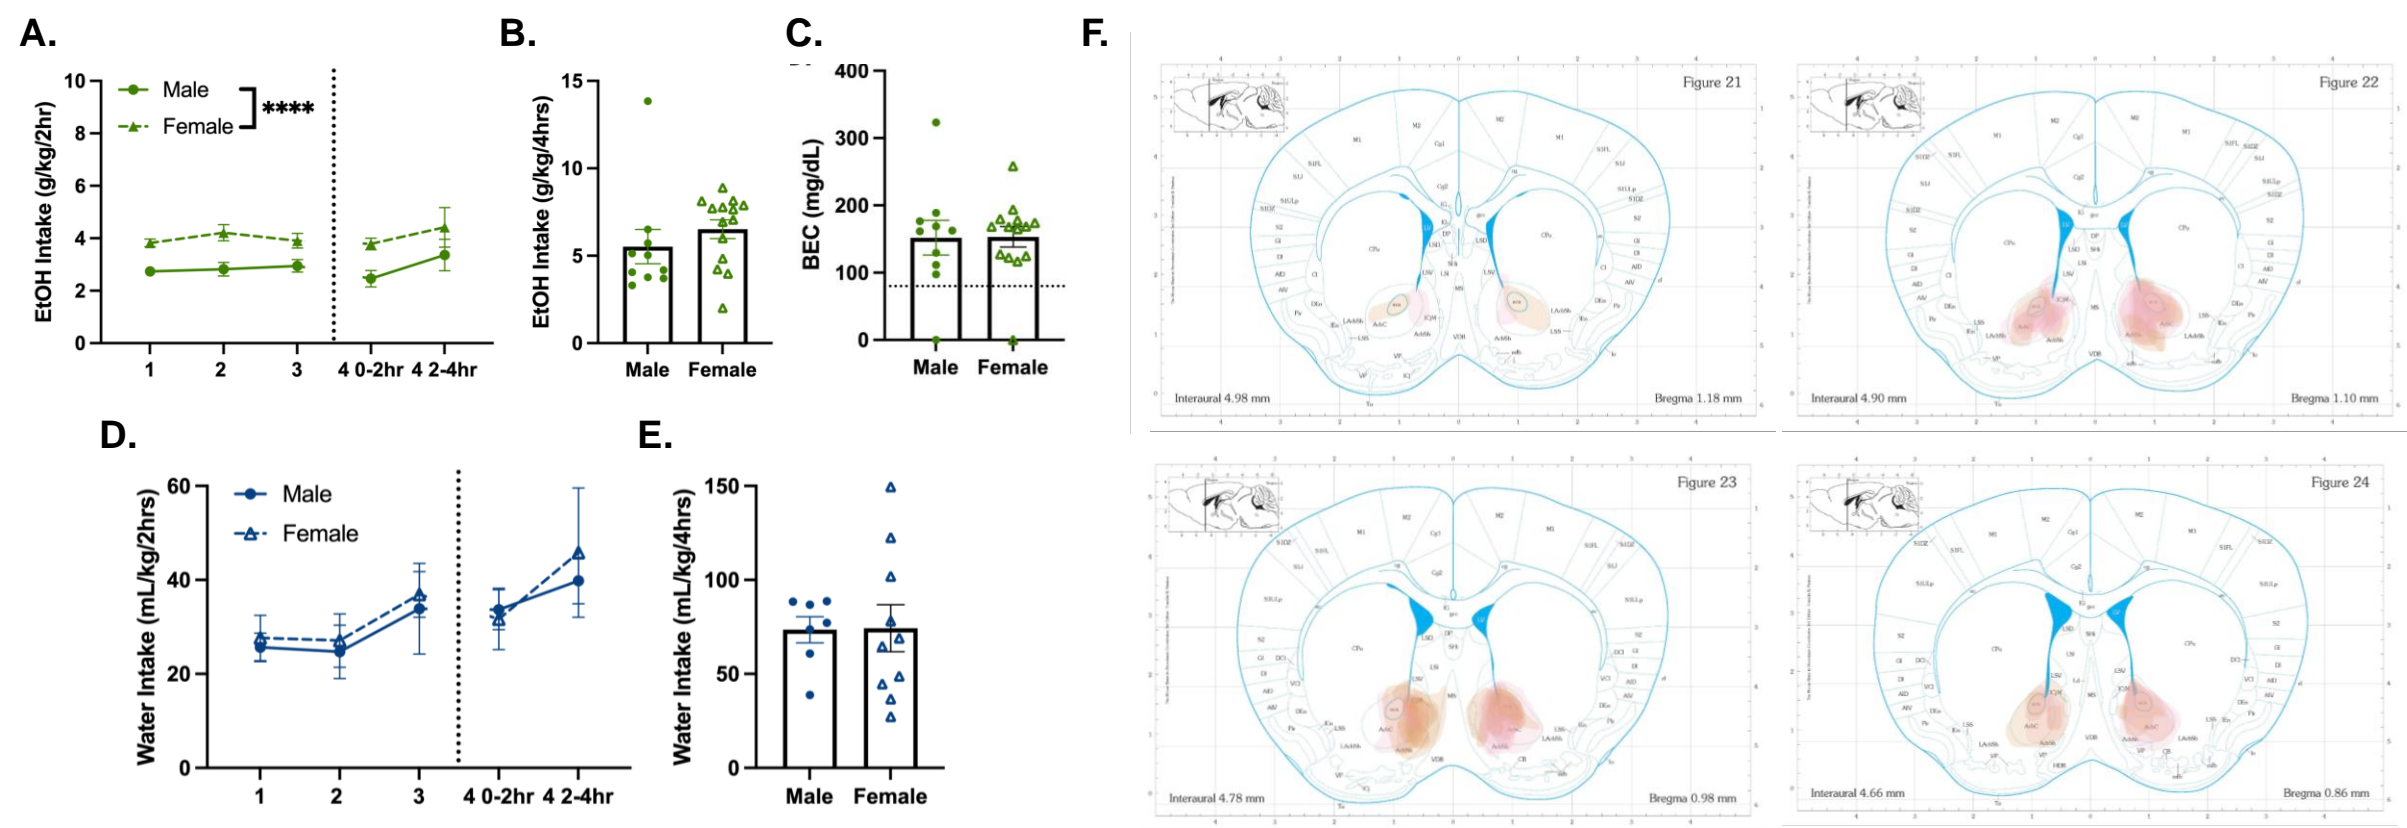

Figure S4

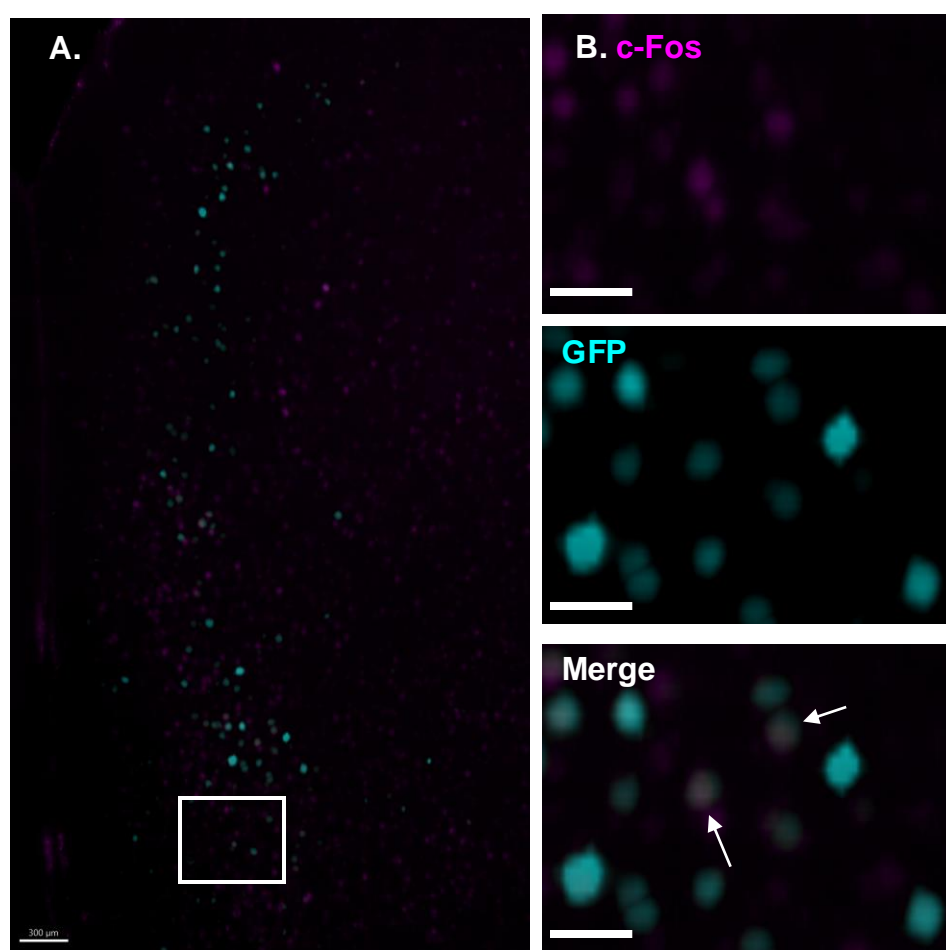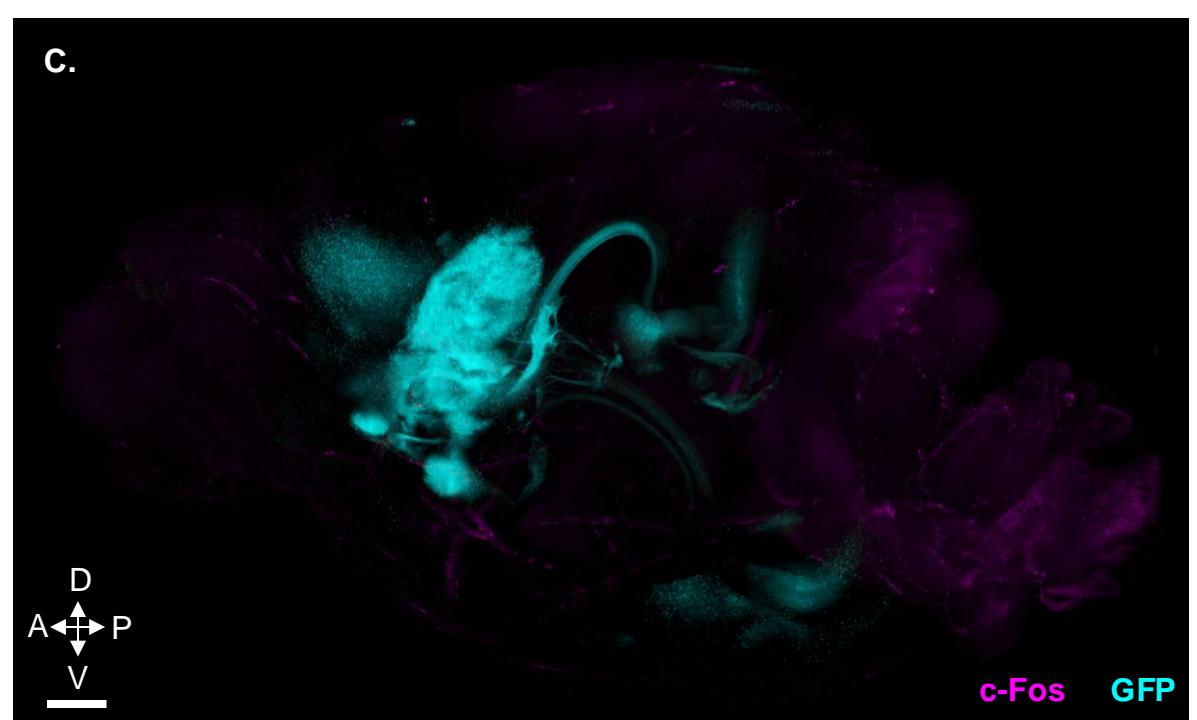

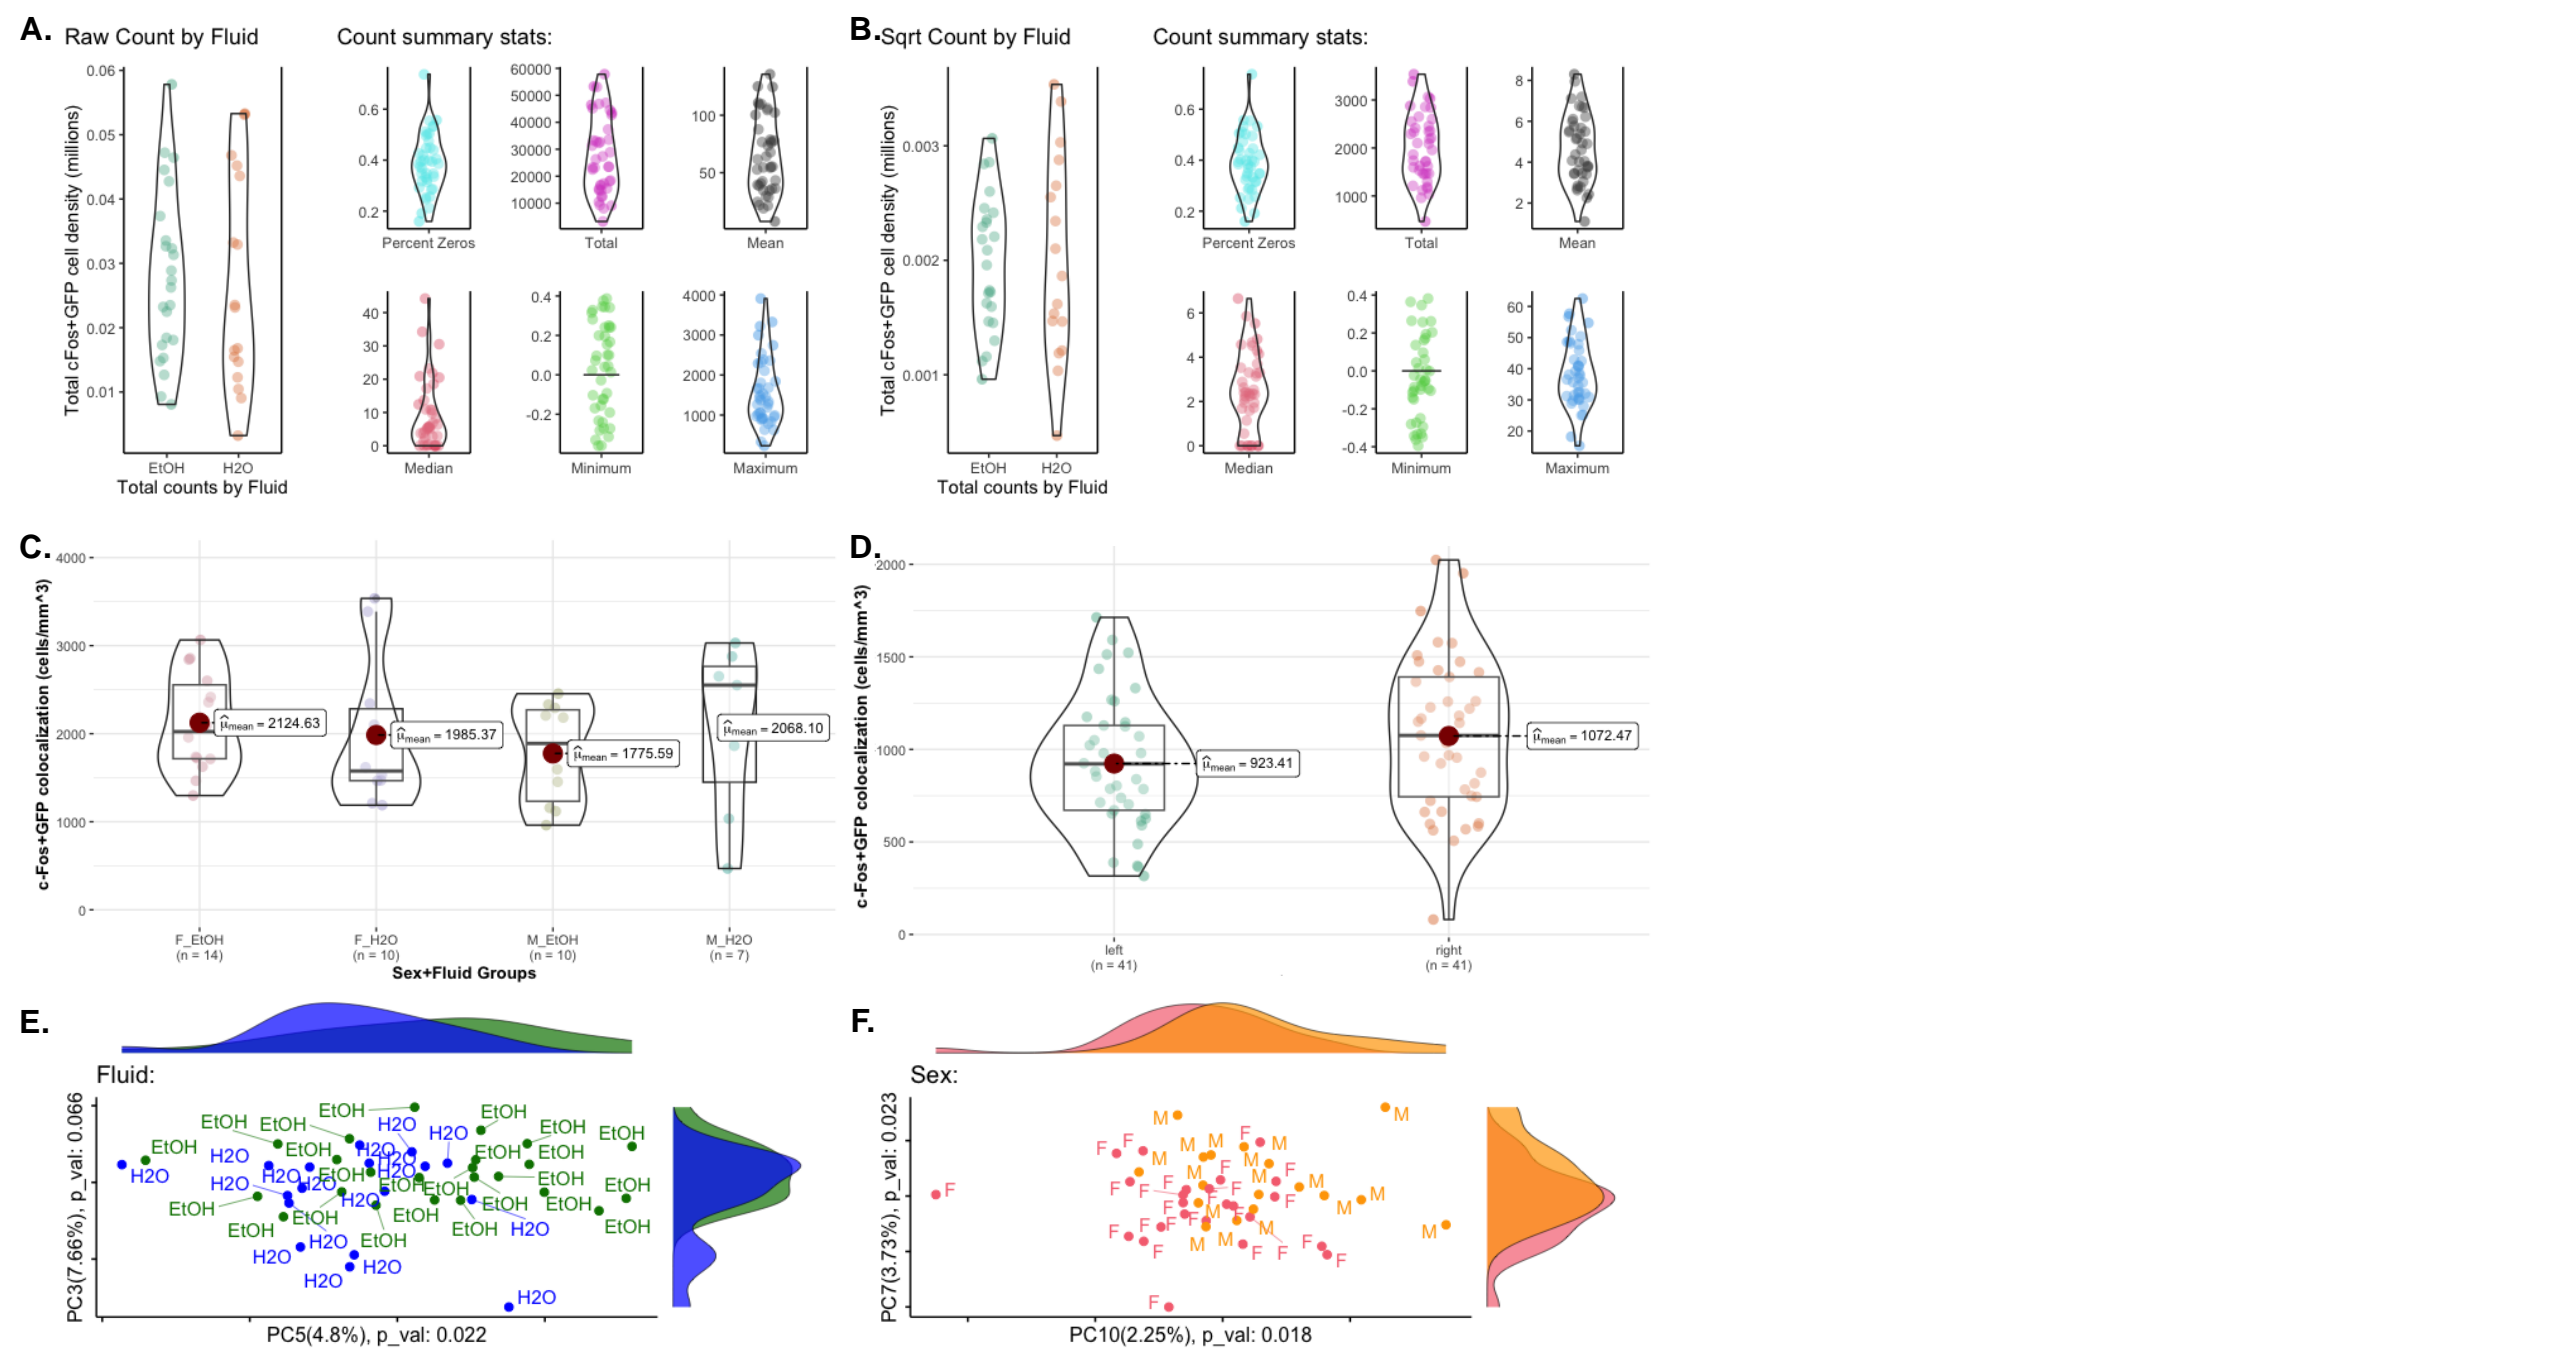

Figure S6

**A. Ethanol vs Water – Sex Collapsed**

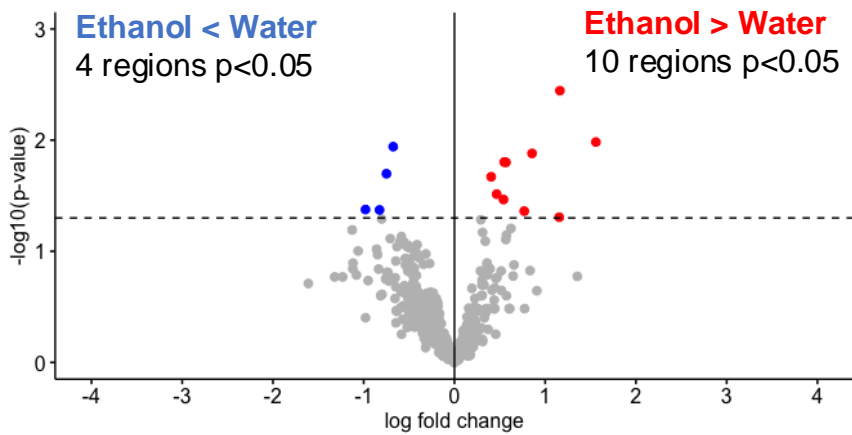

**B. Female v Male – Fluid Collapsed**

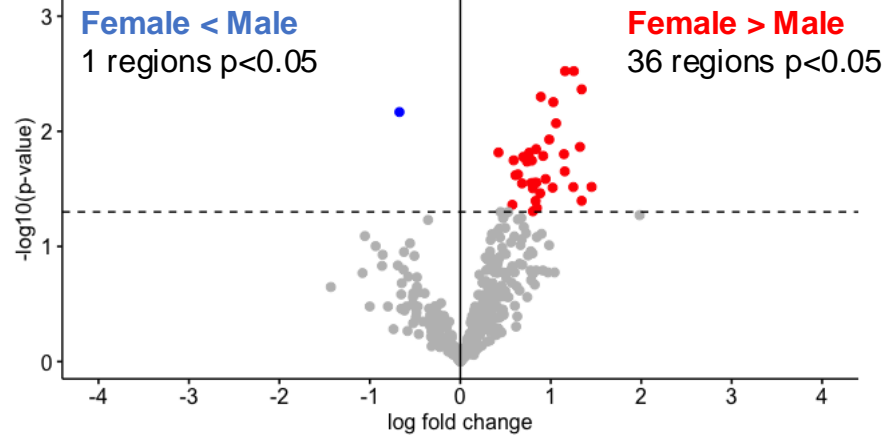

**C. Female: Ethanol v Water**

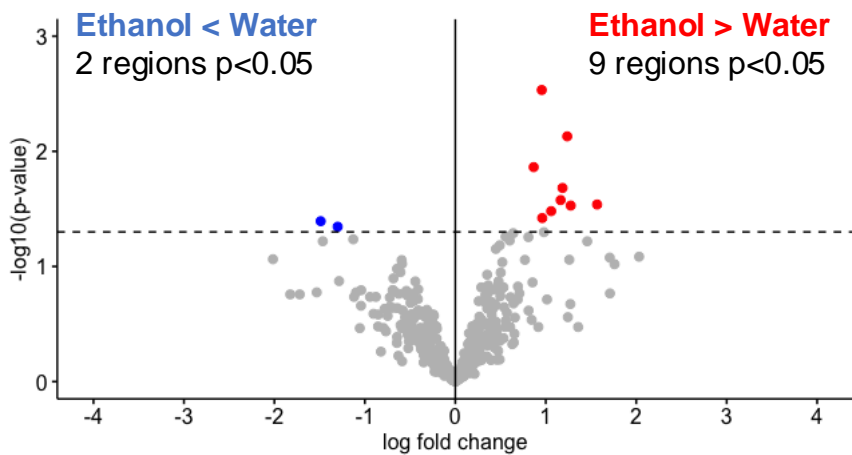

**D. Male: Ethanol v Water**

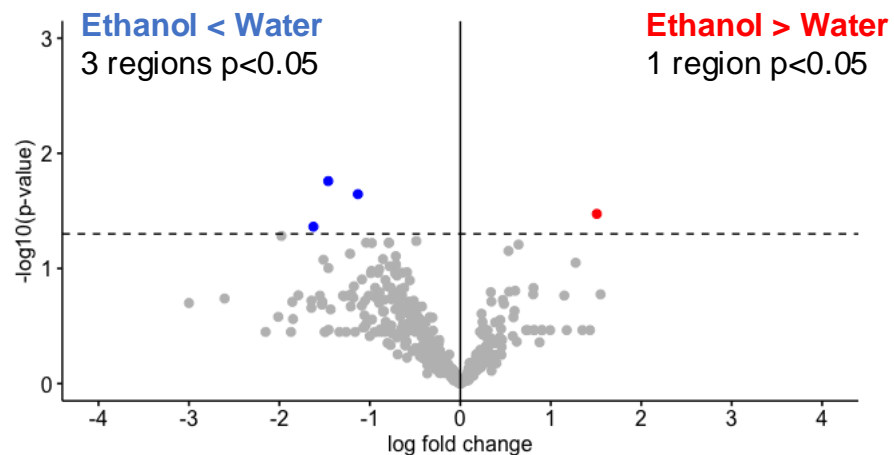

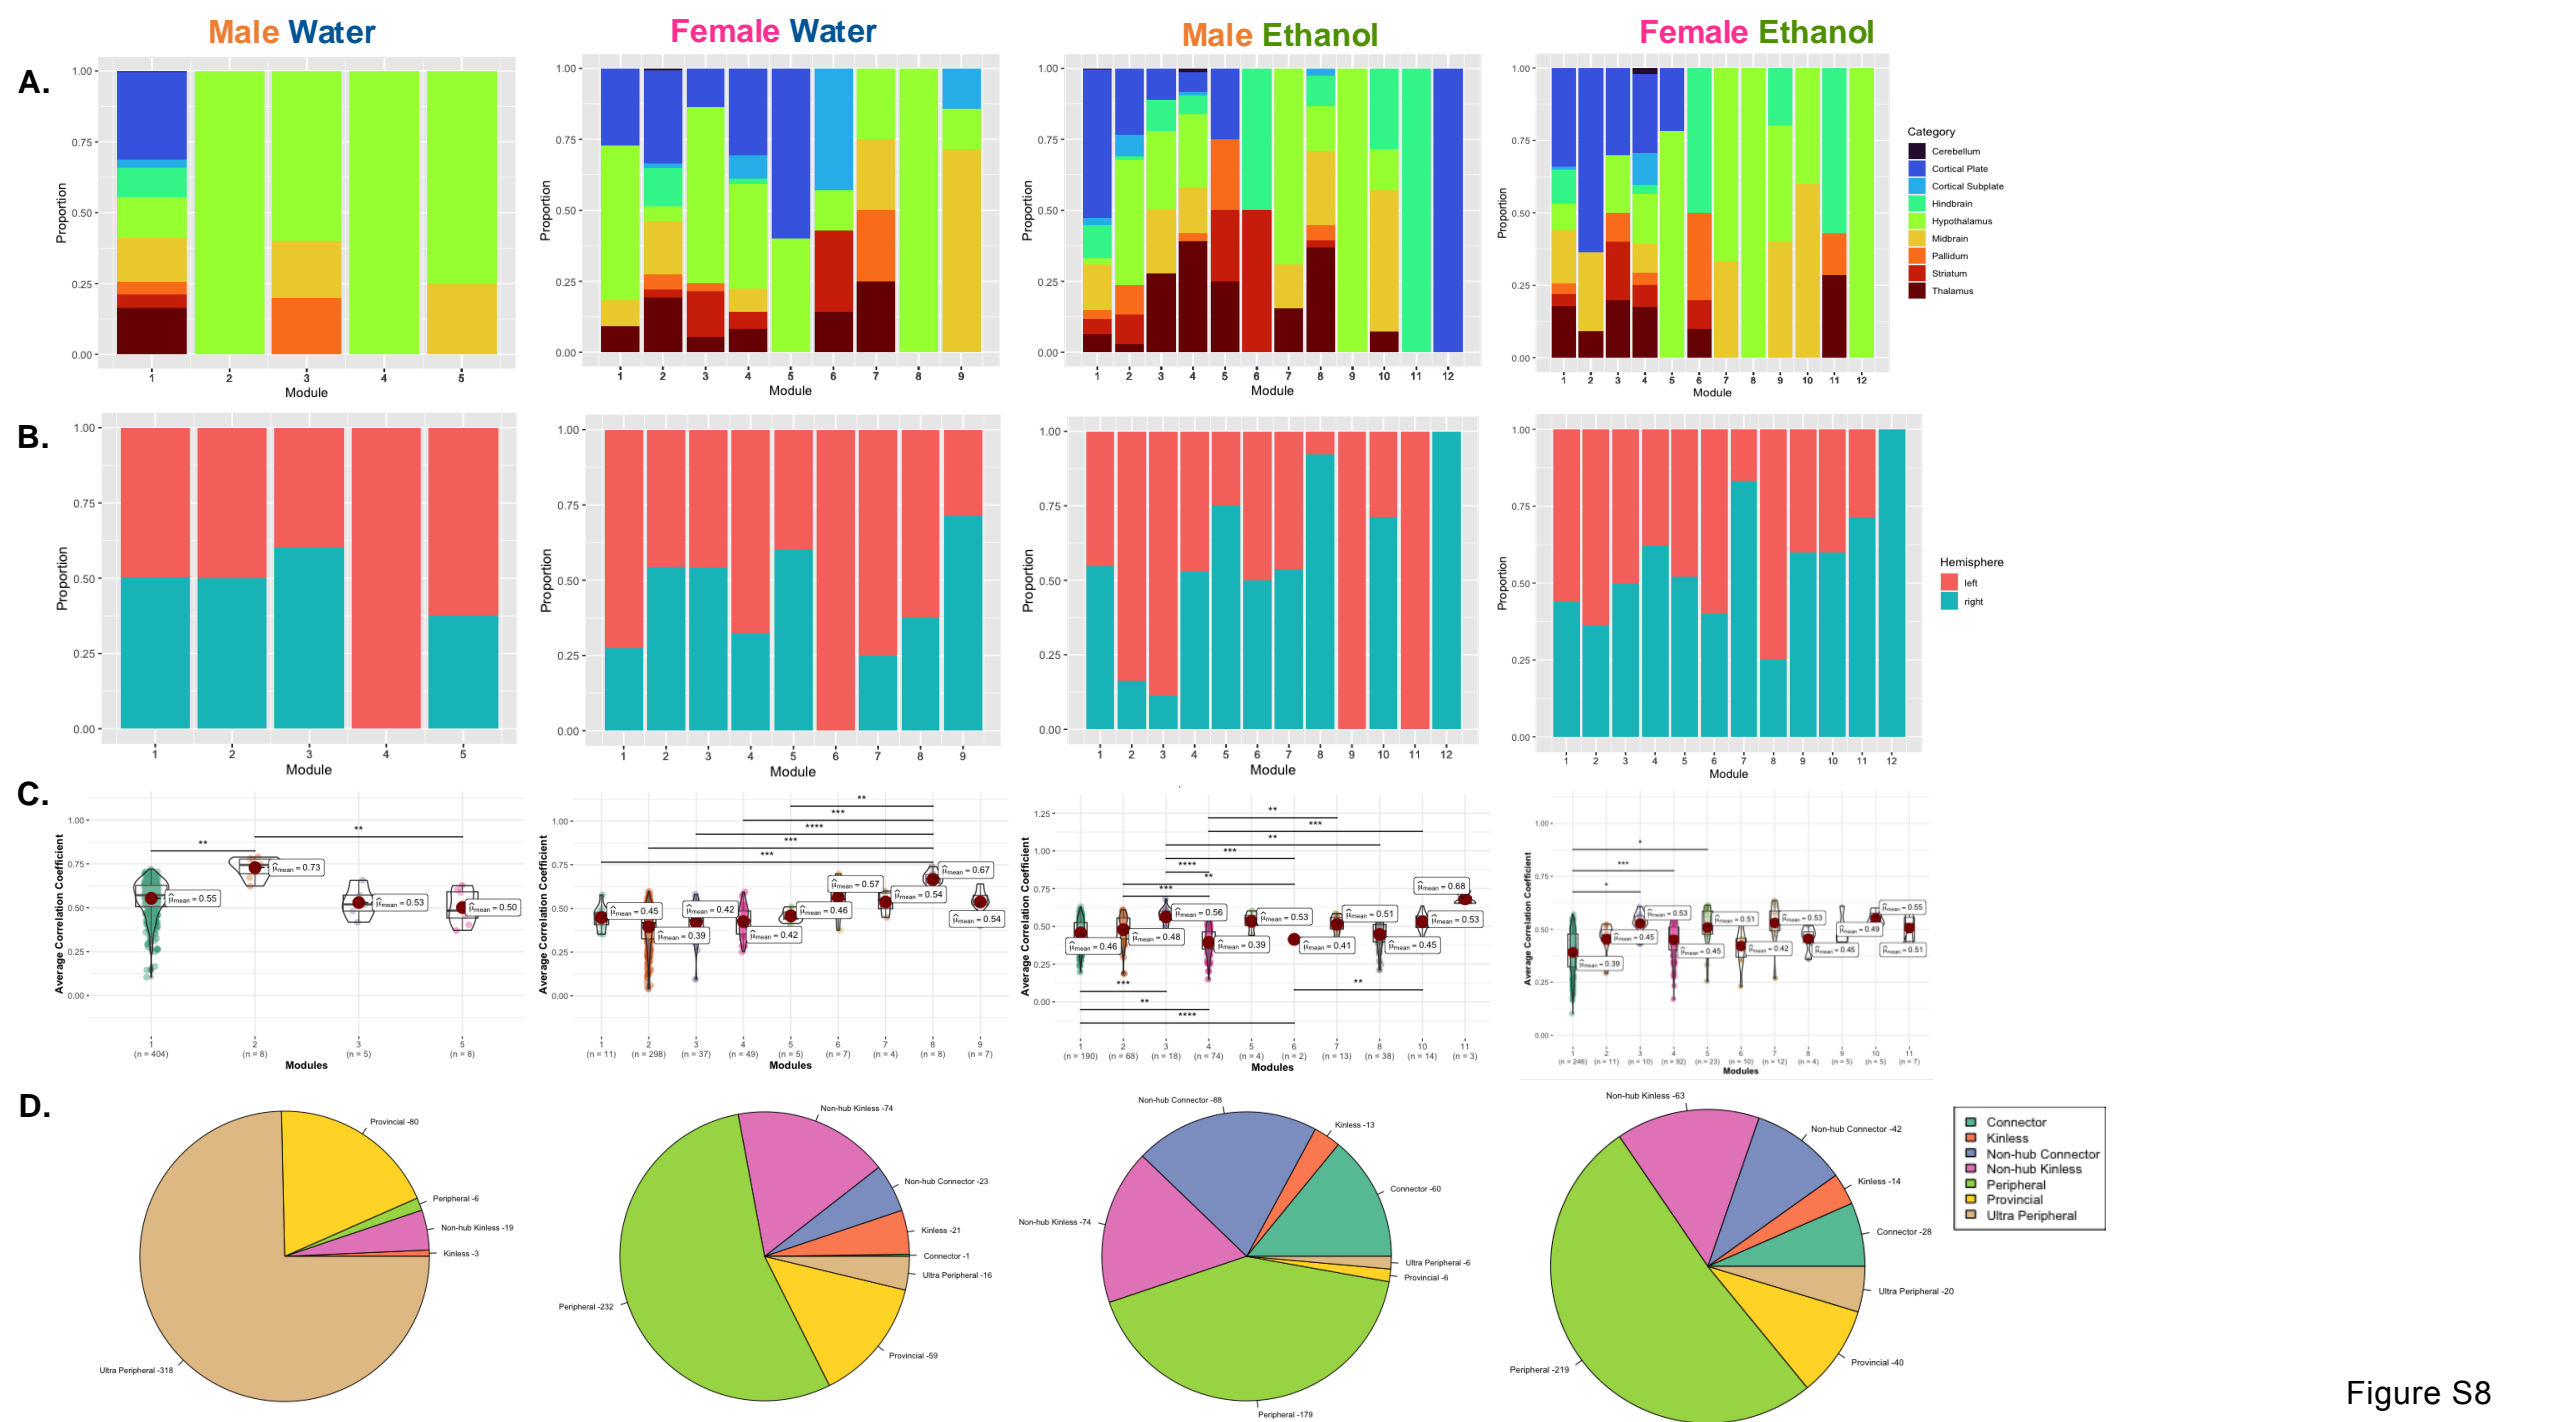

Figure S8



### A. Cortical Plate

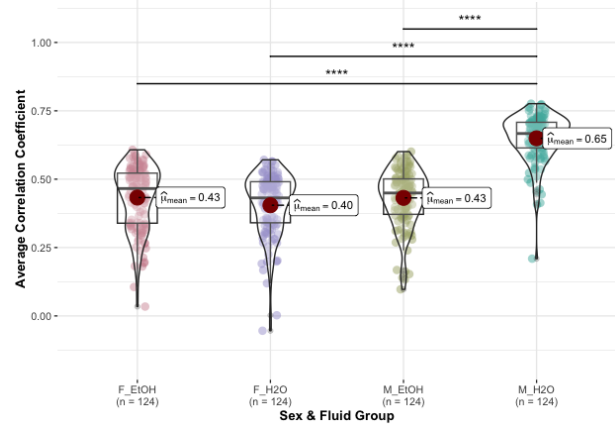

### B. Cortical Subplate

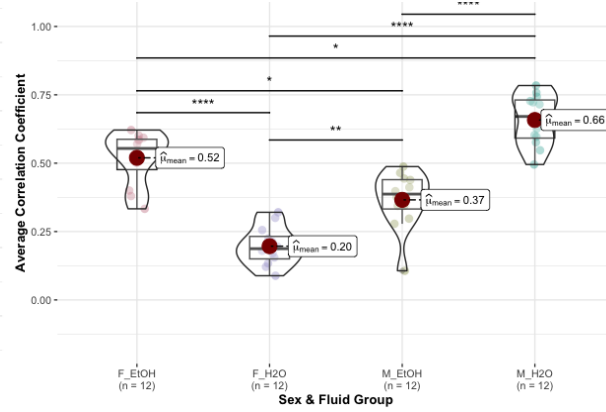

### C. Hindbrain

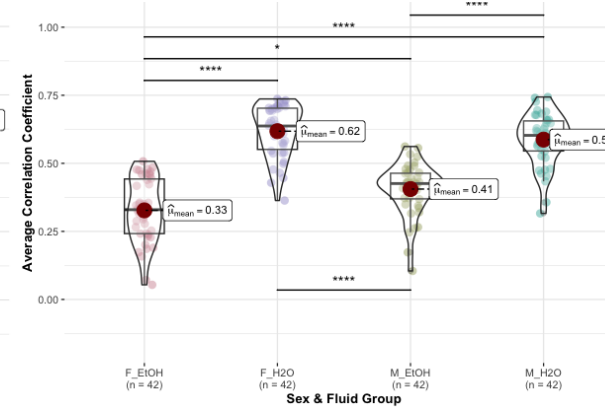

### D. Hypothalamus

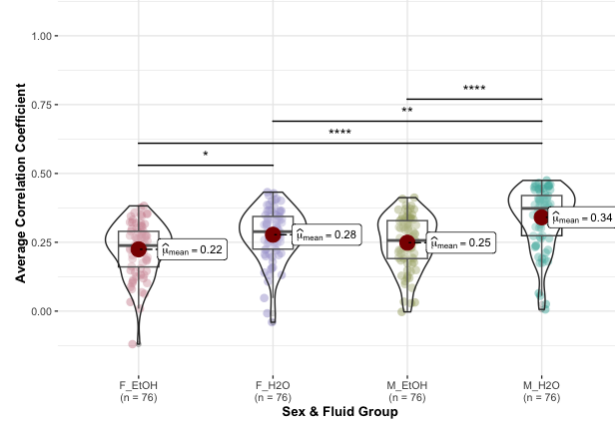

### E. Midbrain

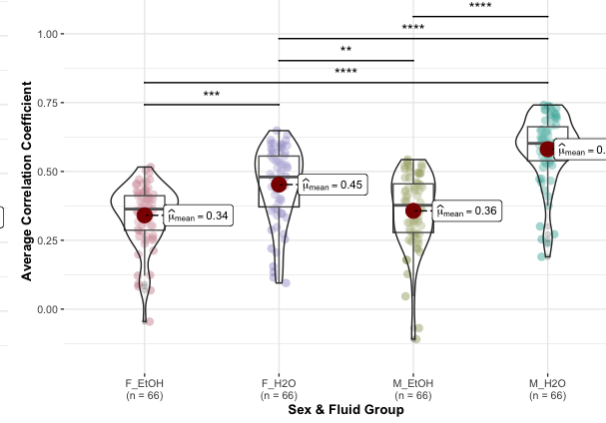

### F. Pallidum

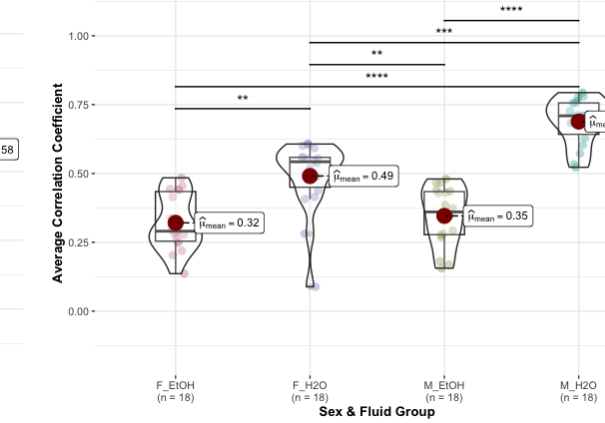

### G. Striatum

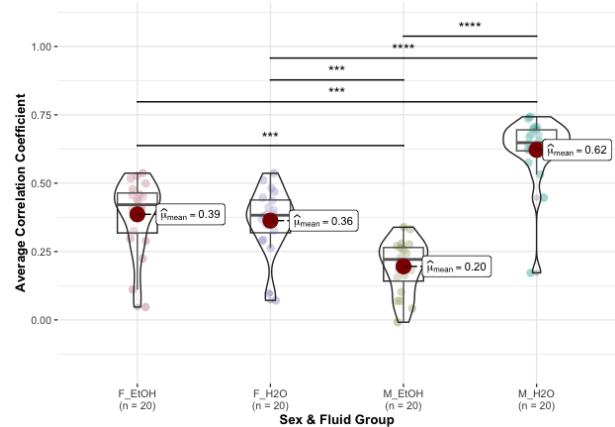

### H. Thalamus

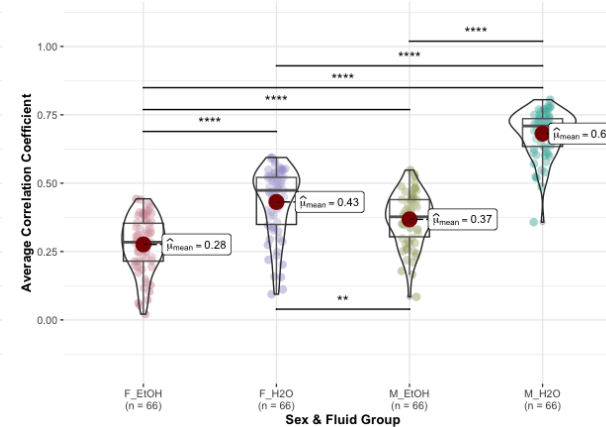

### I. Largest Module

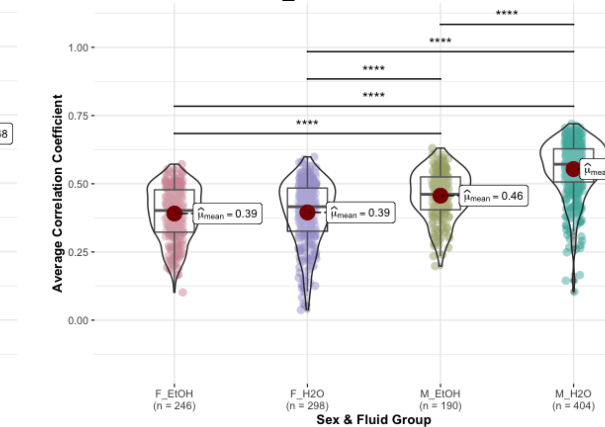

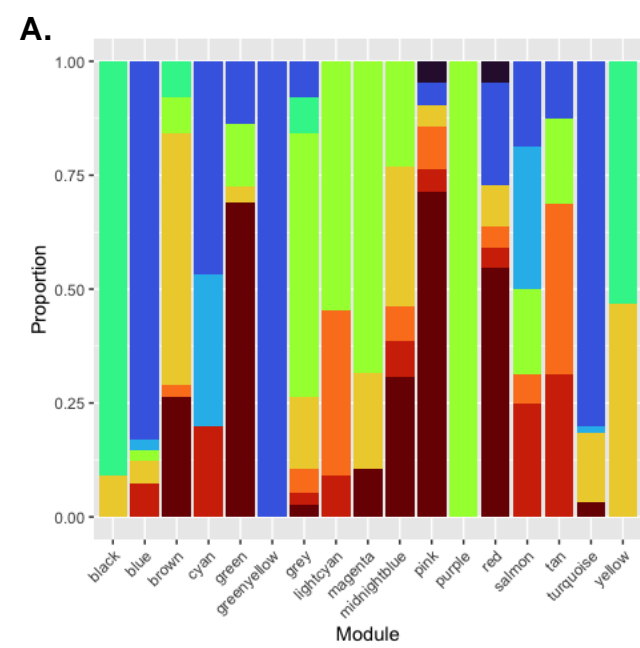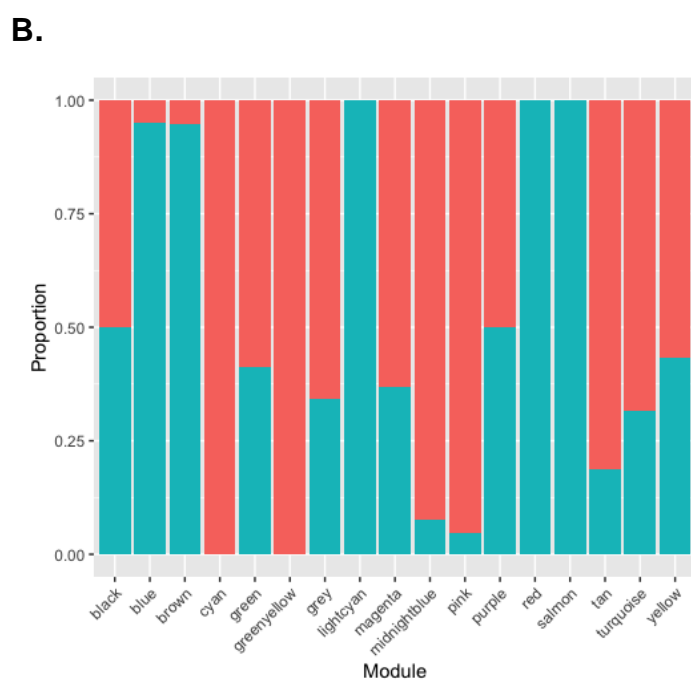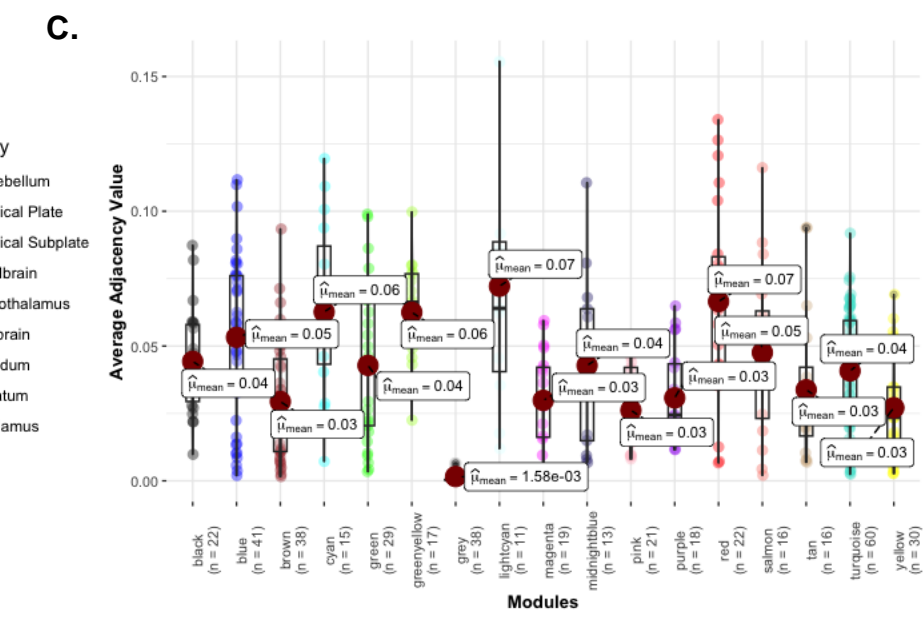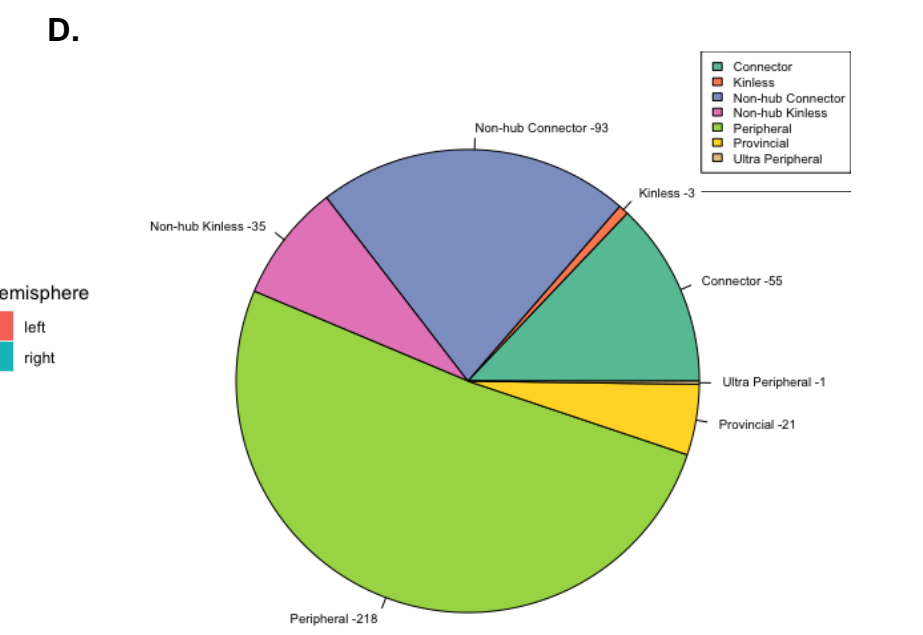

**Significant Module Pair-wise Comparisons**

| Group 1     | Group 2     | Holm's adj p-val |      |
|-------------|-------------|------------------|------|
| black       | grey        | 1.70e-05         | ***  |
| blue        | grey        | 2.11e-09         | **** |
| brown       | greenyellow | 0.02             | *    |
| brown       | grey        | 6.09e-05         | ***  |
| cyan        | grey        | 0.03             | *    |
| green       | grey        | 2.77e-04         | ***  |
| greenyellow | grey        | 4.19e-06         | **** |
| greenyellow | pink        | 6.08e-03         | **   |
| greenyellow | yellow      | 5.75e-03         | **   |
| grey        | magenta     | 0.03             | *    |
| grey        | pink        | 0.01             | *    |
| grey        | purple      | 0.03             | *    |
| grey        | red         | 8.04e-04         | ***  |
| grey        | turquoise   | 2.72e-09         | **** |
| grey        | yellow      | 3.75e-04         | ***  |

Figure S10
